# Supplementary material
Source: publisher figshare collection journal article supplement (https://acs.figshare.com/ndownloader/files/25950604)

# SUPPORTING INFORMATION

## FOR

**Cannabichromene, related phytocannabinoids, and 5-fluoro-cannabichromene have anticonvulsant properties in a mouse model of Dravet syndrome**

Lyndsey L. Anderson, Adam Ametovski, Jia Lin Luo, Declan Everett-Morgan, Iain S. McGregor, Samuel D. Banister and Jonathon C.

Arnold

### CONTENTS:

**Figure S1**

**Figure S2**

**Figure S1.**  $^1\text{H}$  (400 MHz,  $\text{CDCl}_3$ ) and  $^{13}\text{C}$  (100 MHz,  $\text{CDCl}_3$ ) NMR spectra for 7-(5-fluoropentyl)-2-methyl-2-(4-methylpent-3-en-1-yl)-2H-chromen-5-ol

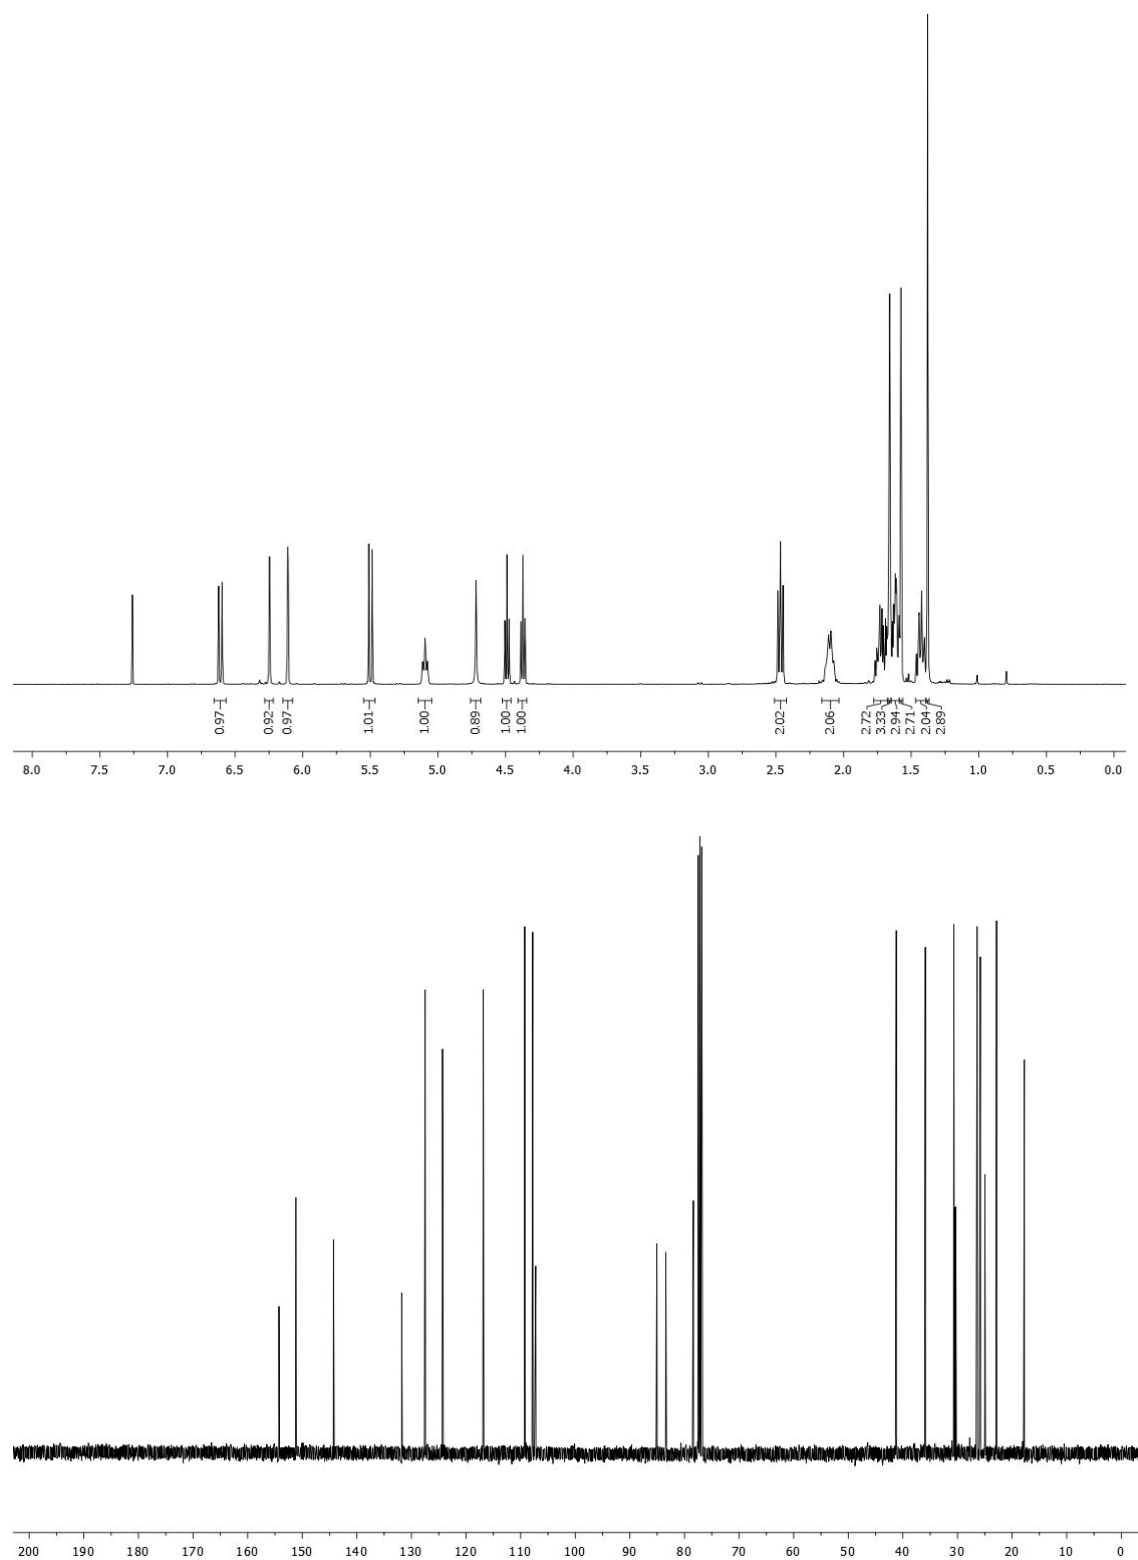

**Figure S2.** LCMS trace for 7-(5-fluoropentyl)-2-methyl-2-(4-methylpent-3-en-1-yl)-2H-chromen-5-ol (**3**)

## UV Chromatogram

mAU

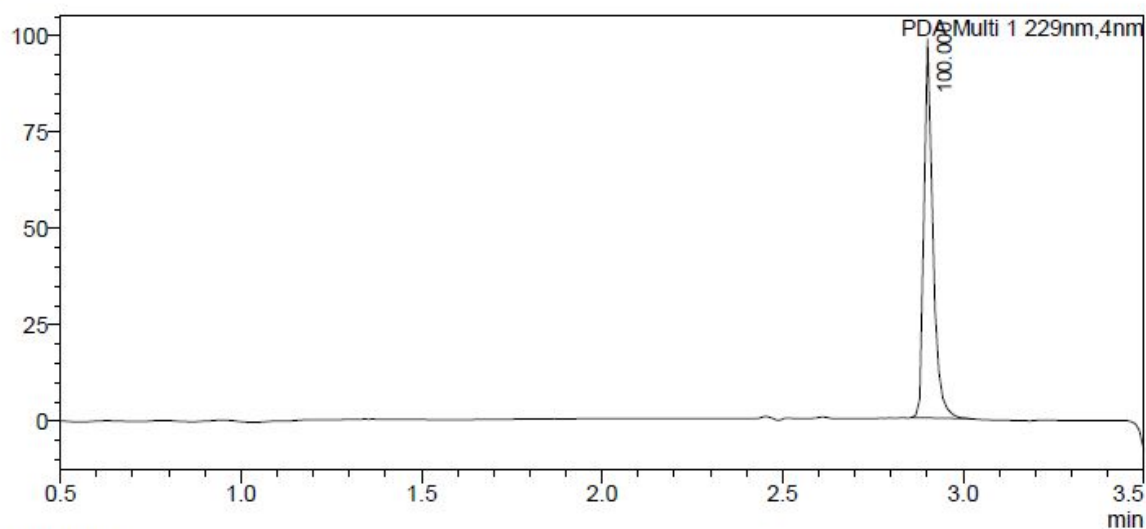

## MS Spectra

Line#:1 R.Time:----(Scan#----)  
MassPeaks:3 Mode: Positive  
Spectrum Mode:Averaged 2.877-2.951(549-563) Base Peak:333.3(1886984)  
BG Mode:Averaged 1.197-2.783(229-531) Segment 1 - Event 1

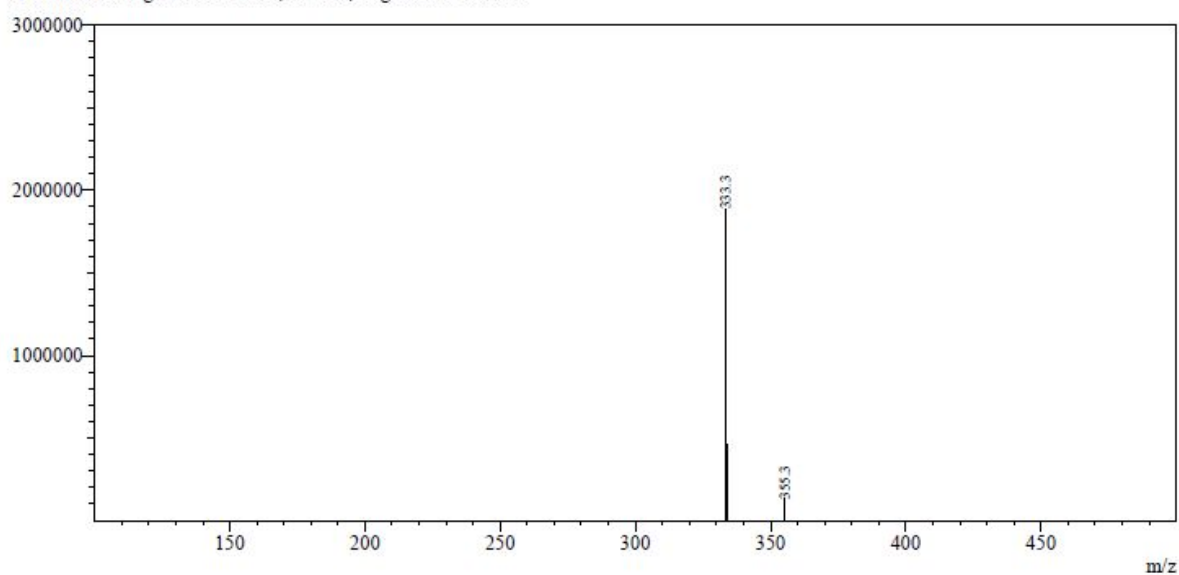

Supplement: Supplementary file 1 [file 25950604]
